# Supplementary material for: Targeting High-Risk Neuroblastoma Patient-Derived Xenografts with Oncolytic Virotherapy
Source: MDPI journal article supplement (doi:10.3390/cancers14030762), 2022-02-01
Supplement: s1 [file s1]

A

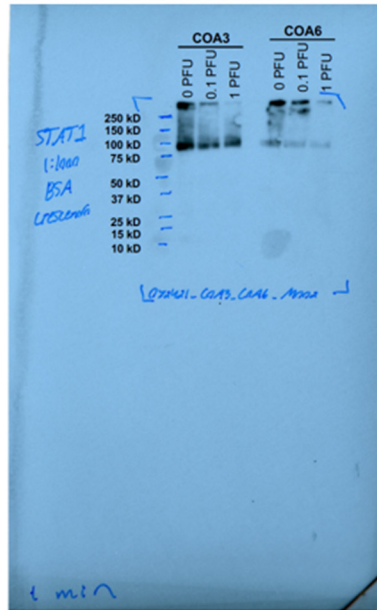

| Lane                 | Ratio |
|----------------------|-------|
| COA3 STAT1 - 0 PFU   | 2.97  |
| COA3 STAT1 - 0.1 PFU | 2.05  |
| COA3 STAT1 - 1 PFU   | 1.91  |

B

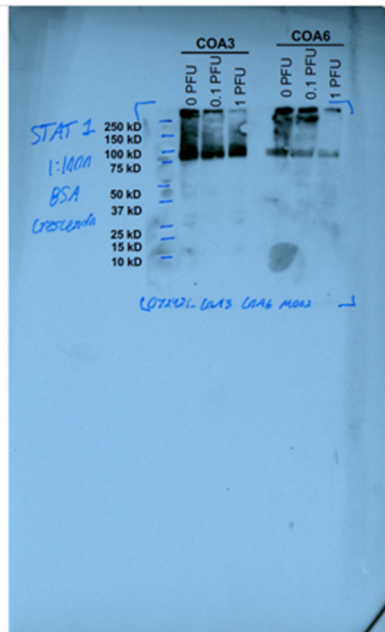

| Lane                 | Ratio |
|----------------------|-------|
| COA6 STAT1 - 0 PFU   | 0.90  |
| COA6 STAT1 - 0.1 PFU | 0.63  |
| COA6 STAT1 - 1 PFU   | 0.42  |

C

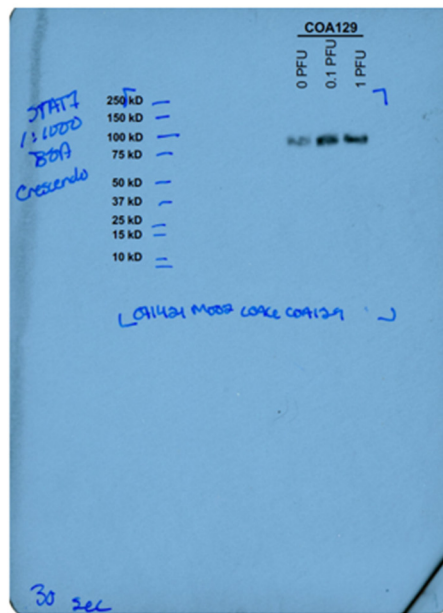

| Lane                   | Ratio |
|------------------------|-------|
| COA129 STAT1 - 0 PFU   | 0.28  |
| COA129 STAT1 - 0.1 PFU | 0.58  |
| COA129 STAT1 - 1 PFU   | 0.53  |

D

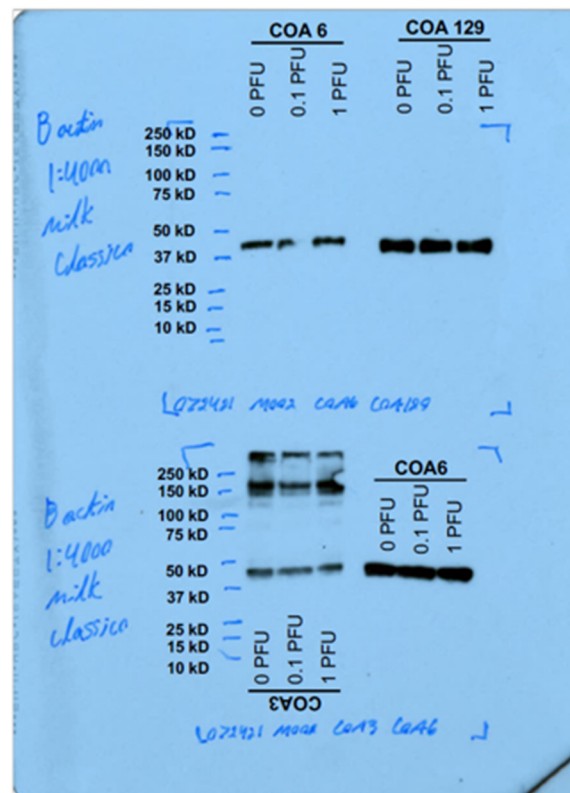

**Figure S1.** Full Western blot scans are provided and densitometry performed for Figure 3C. Following infection with M002, there is a decrease in the expression of STAT1 in COA3 (A) and COA6 (B) with increasing MOIs (0, 0.1, 1 PFU) of M002. Conversely, there is an increase in STAT1 expression in COA129 (C) with M002 infection. (D)  $\beta$ -actin was utilized as a loading control for all blots.

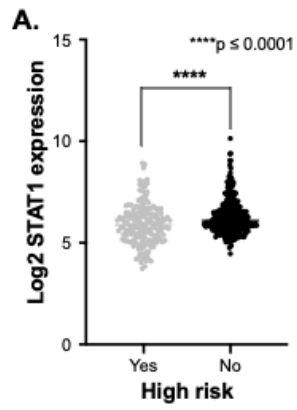

**Figure S2.** High-risk neuroblastoma expresses less STAT1. Using the SEQC publicly available database, STAT1 expression was compared across human neuroblastoma tumors that were classified as high-risk and non-high-risk. High-risk tumors were more likely to have significantly lower STAT1 in comparison to non-high-risk tumors.
